# Supplementary material
Source: HighWire-hosted journal article supplement (doi:10.1101/rna.033399.112)
Supplement: Fukuda033399_SUP.docx [file Fukuda033399_SUP.docx]

**A strategy for developing a hammerhead ribozyme for selective RNA cleavage depending on substitutional RNA editing**

Masatora Fukuda, Kei Kurihara, Yasusoshi Tanaka, Masanobu Deshimaru

Department of Chemistry, Faculty of Science, Fukuoka University, Nanakuma 8-19-1, Jonan-ku, Fukuoka 814-0180, Japan

**Supplementary Information**

**Figure S1.**

Time course of cleavage reaction and kinetic analysis for HR-*APOB* against unedited- and edited-*APOB* RNA fragments under single-turnover conditions. (A) Denaturing PAGE (15%) showing time course of cleavage of HR-*APOB*-edit against *APOB*-ade (upper) and *APOB*-ino (lower).

**Figure S2.**

A-to-I editing-specific cleavage of ribozyme against *FLNA* mRNA fragment. (A) Sequences of ribozymes and substrates of synthetic *FLNA* mRNA fragment. HR-*FLNA*-edit was generated by introducing C as the recognition base for A-to-I editing recognition. Unedited- and edited-substrate were denoted as *FLNA*-ade and *FLNA*-ino, respectively. (B) Analysis of A-to-I editing-specific cleavage by ribozyme using denaturing PAGE (15%). The cleavage reaction was performed with *FLNA*-ade (left) and *FLNA*-ino (right) in the presence of an excess of ribozyme at 37°C for 1 h. Positions of the 5′-labeled substrates (S) and of the resulting 5′-cleavage products (P) are indicated. (C) Summary of the cleavage ratios obtained from experiment (B) for HR-*FLNA* and HR-*FLNA*-edit against *FLNA*-ade and *FLNA*-ino. Intensities of the substrate band (S) and cleavage product band (P) were quantified, and the cleavage ratios were calculated using the expression P/(S + P). All data were obtained from 2 independent experiments. Fitting to a single-exponential equation generated progress curves for the cleavage reactions of HR-*FLNA*/*FLNA*-ino and HR-*FLNA*-edit/*FLNA*-ade, and the data obtained for HR-*FLNA*/*FLNA*-ade and HR-*FLNA*-edit/*FLNA*-ino were fitted to a double-exponential equation. Kinetic parameters obtained in this experiment are summarized in Table 1.

**Figure S3.**

Quantification of editing ratio of *FLNA* mRNA after the ribozyme reaction. Bar graph shows the editing ratios at Q/R site with HR-*FLNA*-edit reaction (dark gray bars) and without reaction (light gray bars) from chromatograms, which generated with using forward FLNA specific primer. Editing ratios were quantified by measuring the peak heights of A and G and calculated on the basis of the peak height of G divided by A+G. Results are presented as an average editing ratio and standard deviation from 2 independent experiments.

**FIGURE S1.**


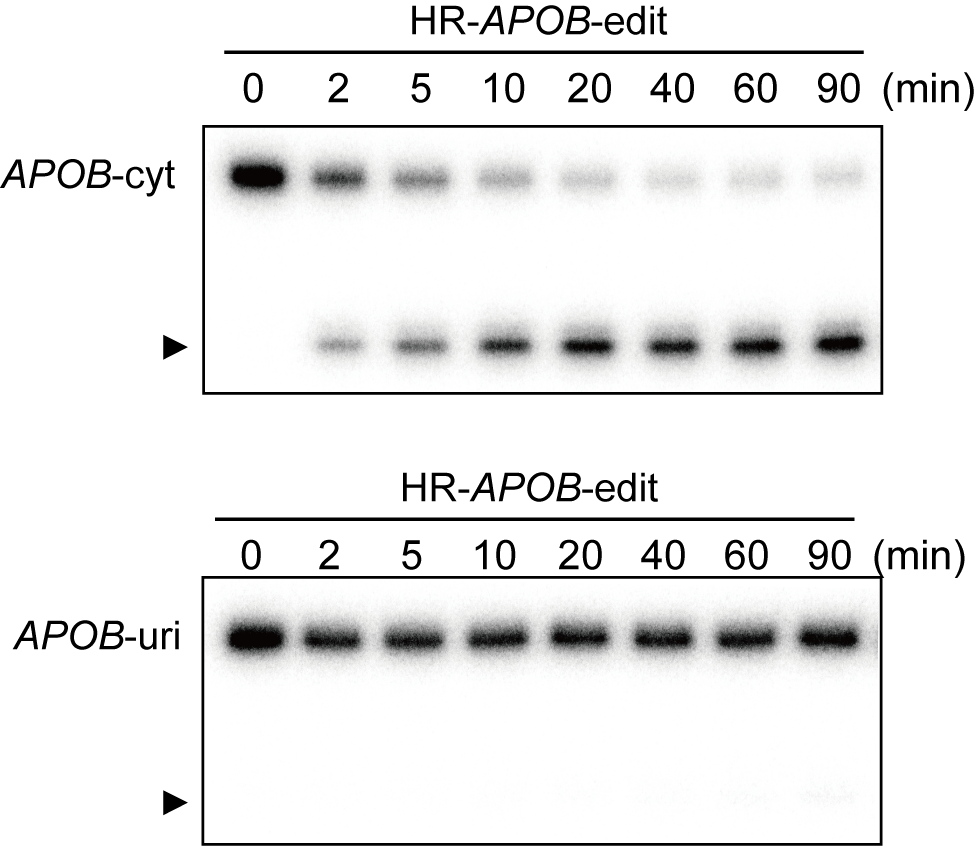


**FIGURE S2.**


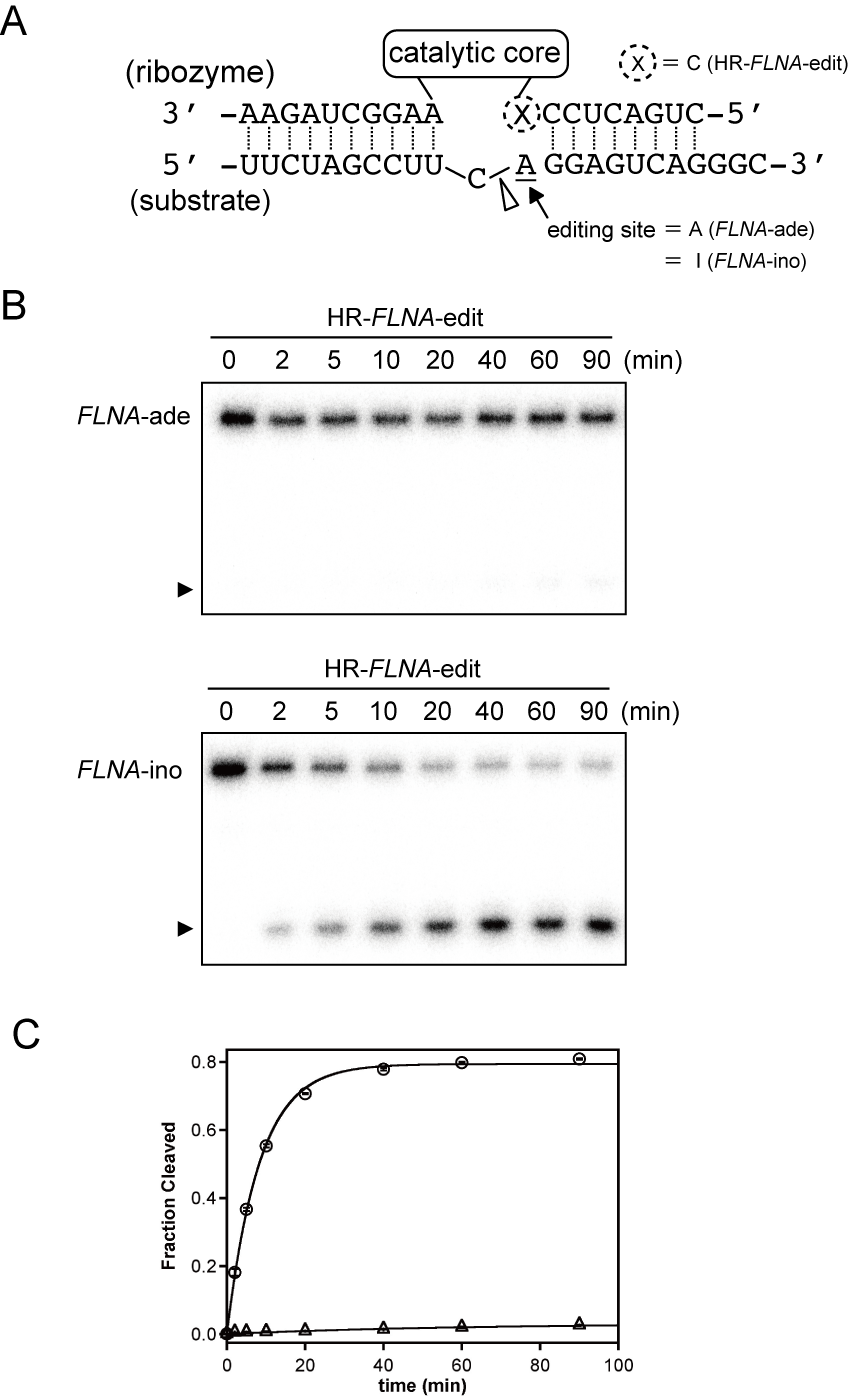


**FIGURE S3.**


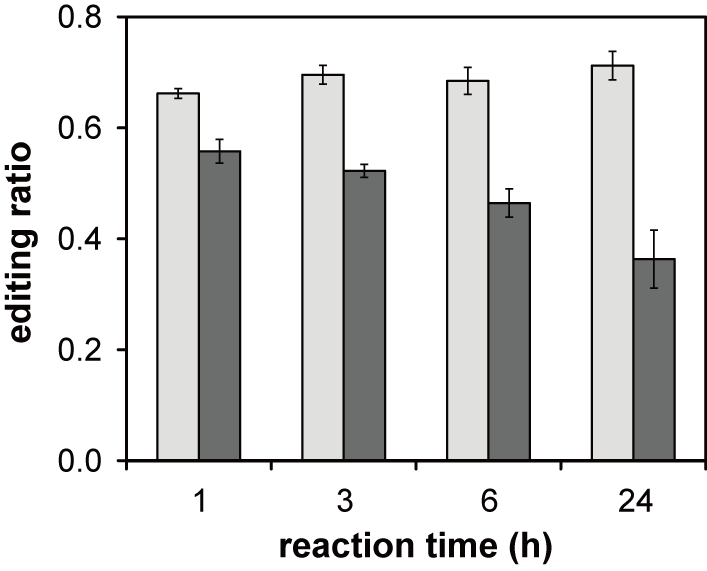


**Table S1.** List of the sequences of synthetic oligonucleotide using in this paper.

| **Designation** | **Sequences of oligonucleotide and deoxyoligonucleotide (5' → 3')** |
| --- | --- |
| HR-*HTR2C* | AGCAATACGTTTCGGCCTTTCGGCCTCATCAGATCCTATTCTATAGTGAGTCGTATTAG |
| HR-*HTR2C*-edit | AGCAATACGTTTCGGCCTTTCGGCCTCATCAGGTCCTATTCTATAGTGAGTCGTATTAG |
| HR-*APOB*-edit_F | CTAATACGACTCACTATAGGGATCAAATTAC |
| HR-*APOB*-edit_R | CATATATGATTTCGGCCTTTCGGCCTCATCAGTAATTTGATCCCTATAG |
| HR-*FLNA*-edit_F | CTAATACGACTCACTATAGGGCTGACTCC |
| HR-*FLNA*-edit_R | TTCTAGCCTTTTCGGCCTTTCGGCCTCATCAGGGGAGTCAGCCCTATAG |
| HR-*FLNA*-mut_R | TTCTAGCCTTTTCGGCCTTTCGGCCTCATTAGGGGAGTCAGCCCTATAG |
|  |  |
| *HTR2C*-ino | GGAUCGGUAUGUAGCAAUACGUAIUCCUAUUGAGCAUAGCC |
| *APOB*-uri | GCAGACAUAUAUGAUAUAAUUUGAUCAG |
| *APOB*-cyt | GCAGACAUAUAUGAUACAAUUUGAUCAG |
| *FLNA*-ade | UUCUAGCCUUCAGGAGUCAGGGC |
| *FLNA*-ino | UUCUAGCCUUCIGGAGUCAGGGC |
